# Supplementary material
Source: PubMed Central journal article supplement (PMC5687850)

# Figure S1

## A

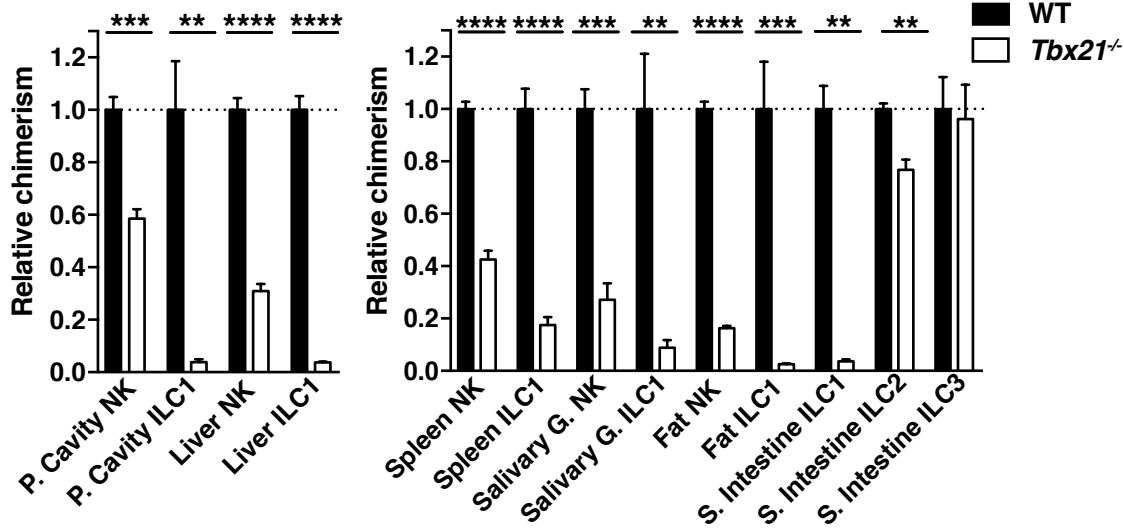

## B

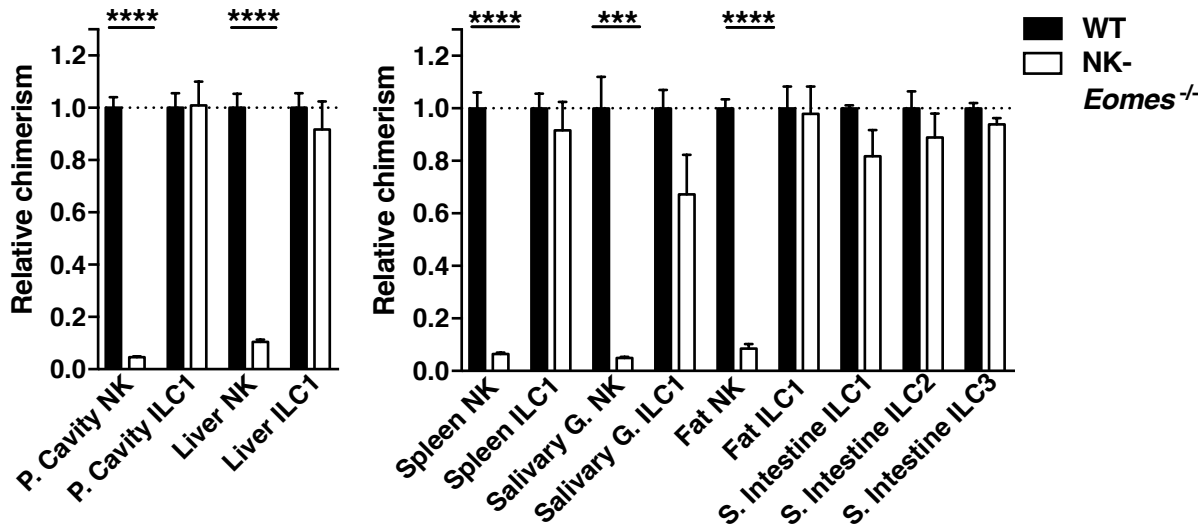

## C

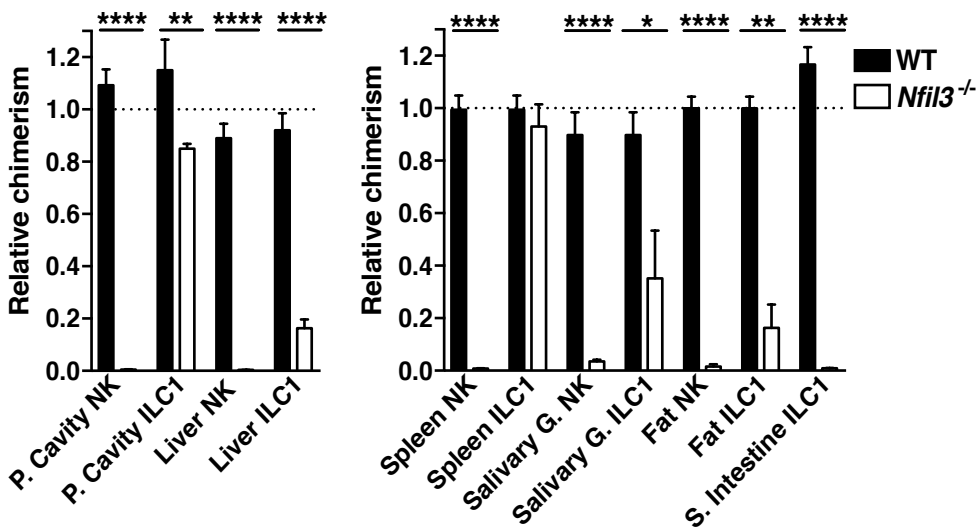

Supplement: NIHMS909950-supplement-1.pdf [file NIHMS909950-supplement-1.pdf]

# Figure S3

**A**

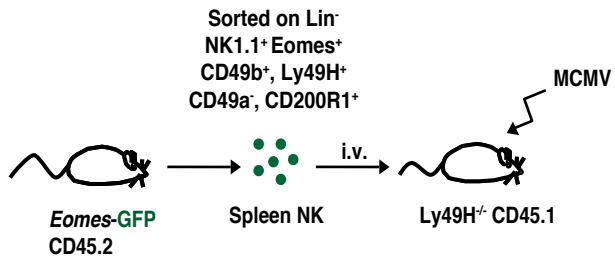

**B**

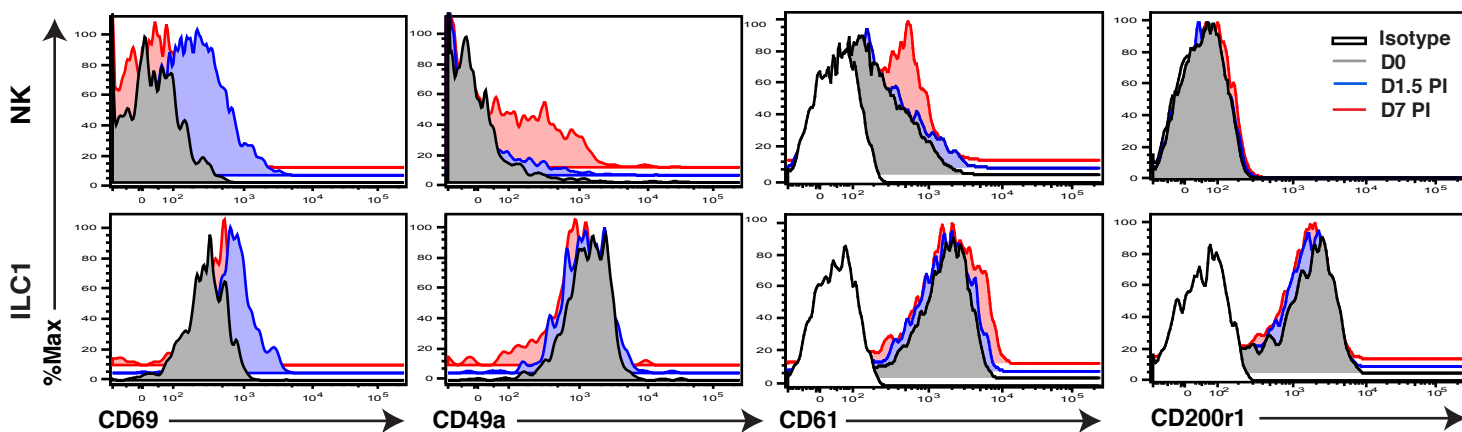

**D**

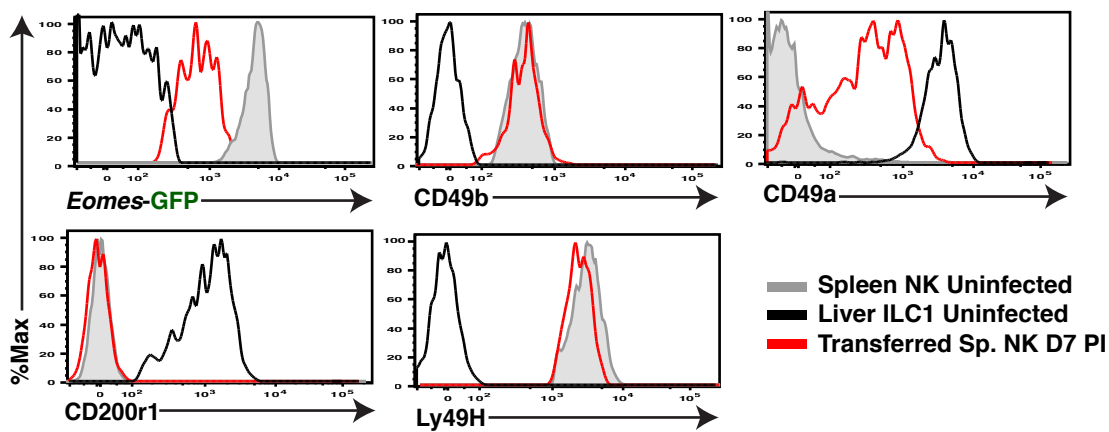

Supplement: NIHMS909950-supplement-3.pdf [file NIHMS909950-supplement-3.pdf]

# Figure S4

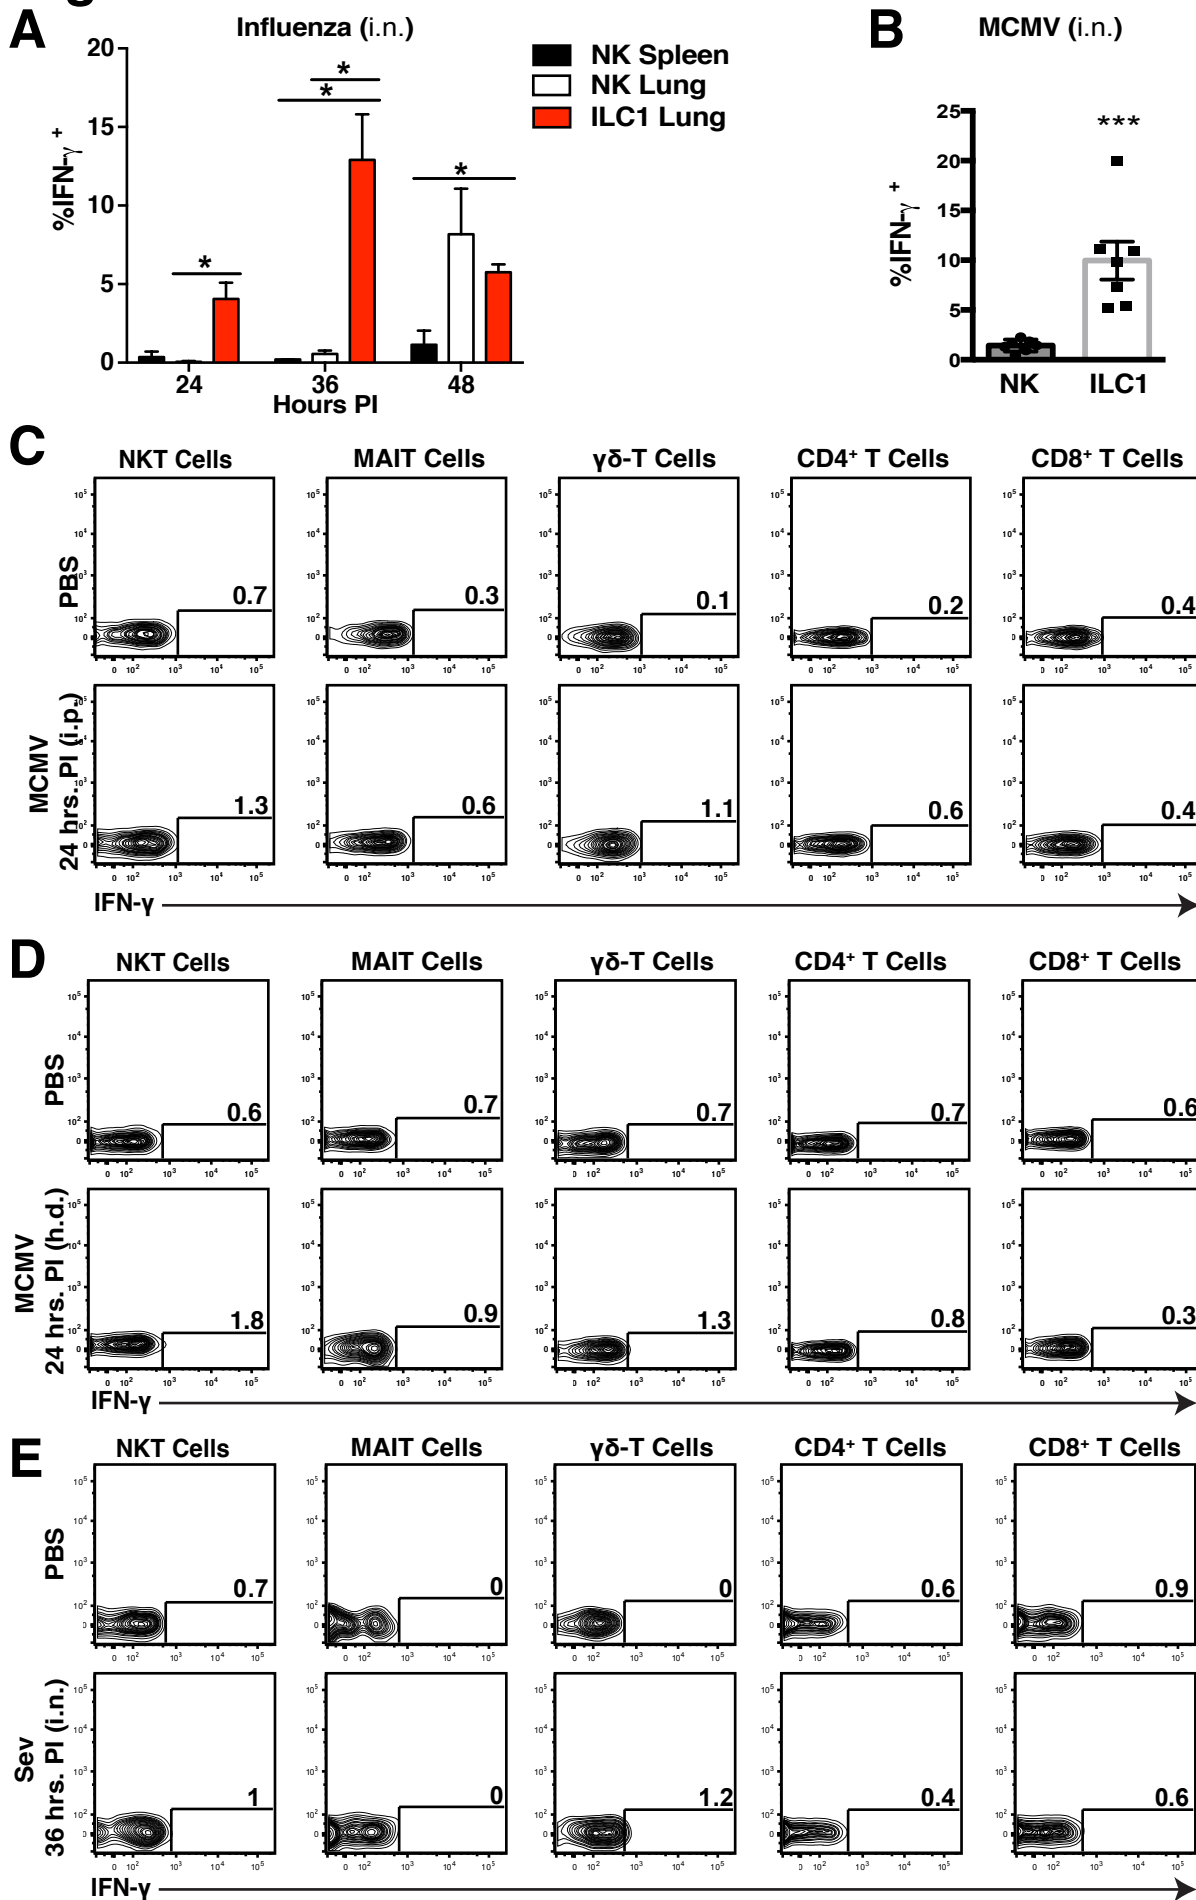

Supplement: NIHMS909950-supplement-4.pdf [file NIHMS909950-supplement-4.pdf]

# Figure S5

## A

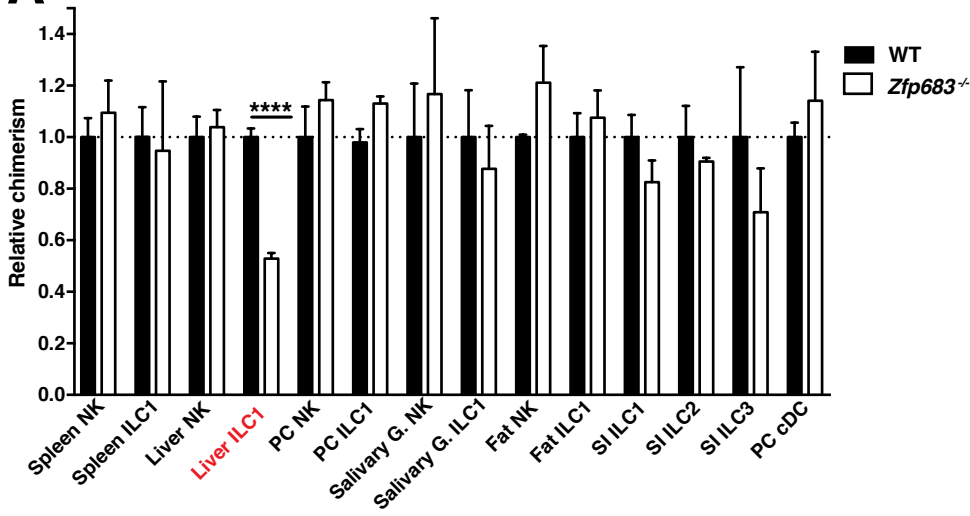

## B

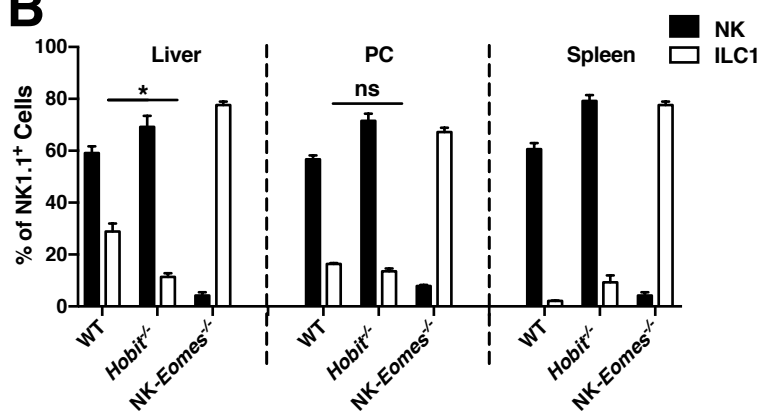

## C

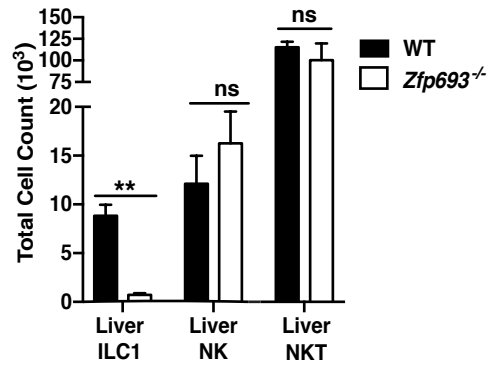

## D

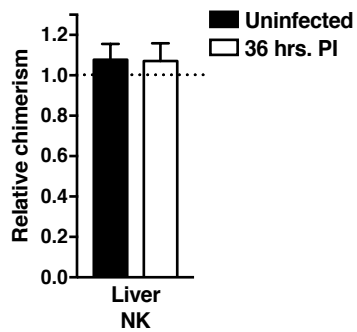

## E

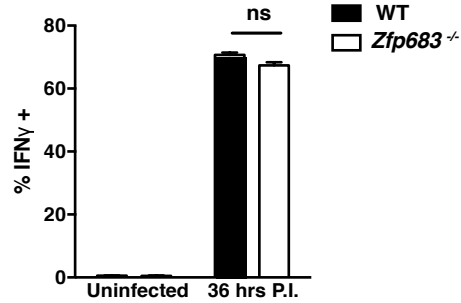

## F

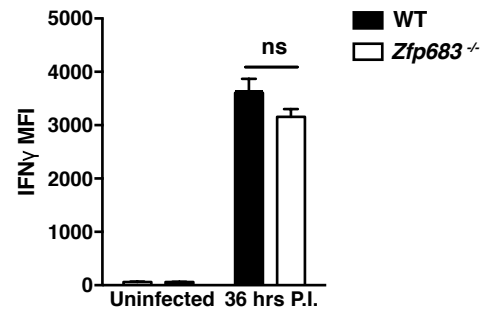

Supplement: NIHMS909950-supplement-5.pdf [file NIHMS909950-supplement-5.pdf]

# Figure S6

**A**

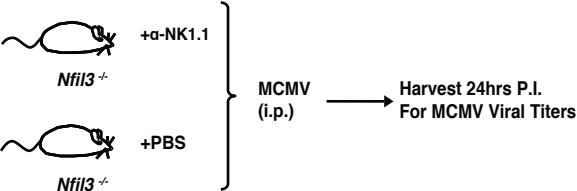

**B**

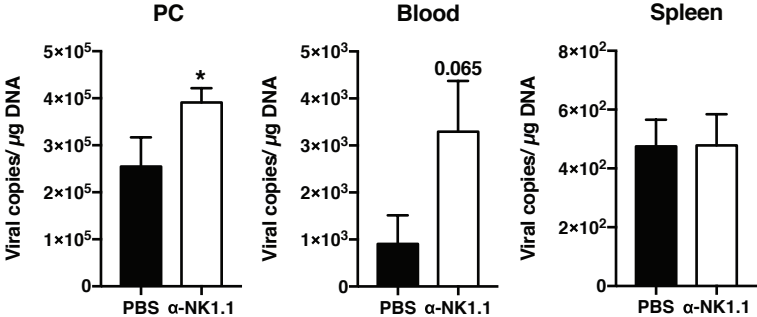

Supplement: NIHMS909950-supplement-6.pdf [file NIHMS909950-supplement-6.pdf]

# Figure S7

## A

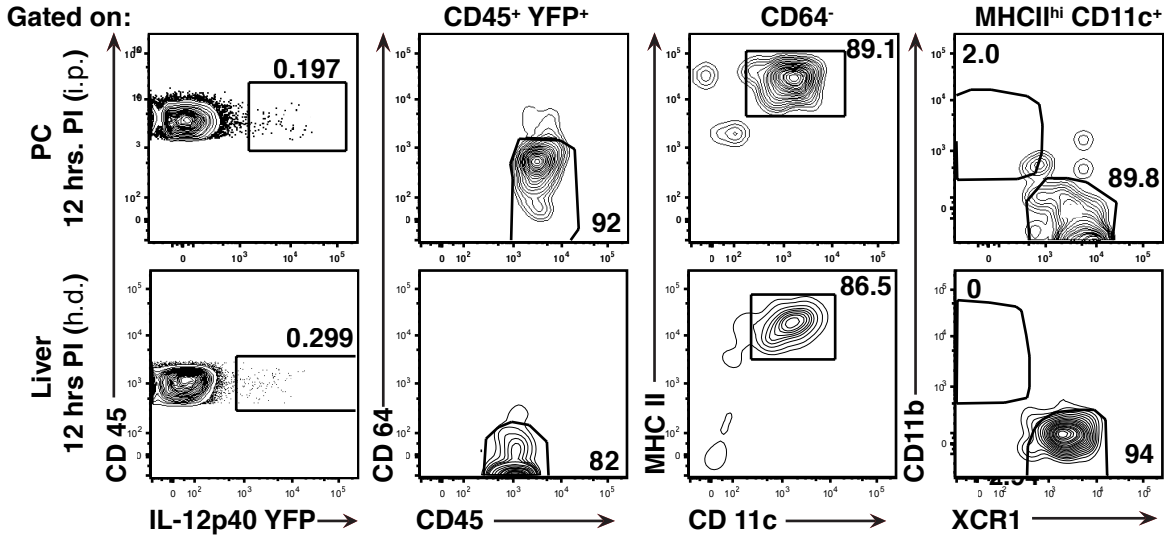

## B

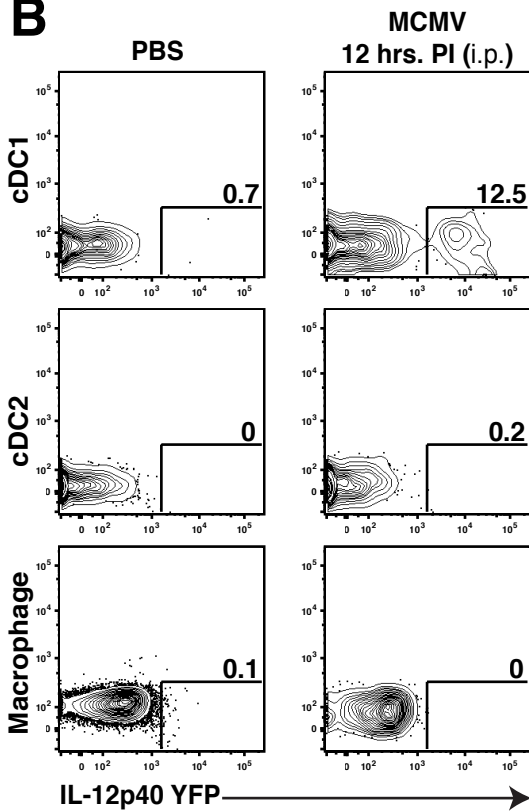

## C

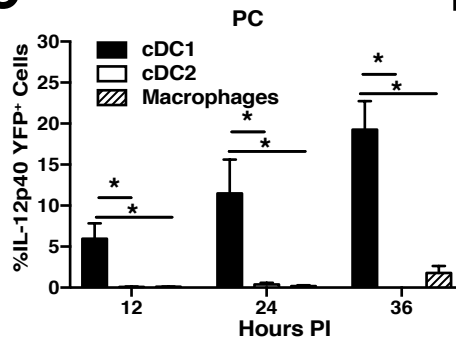

## D

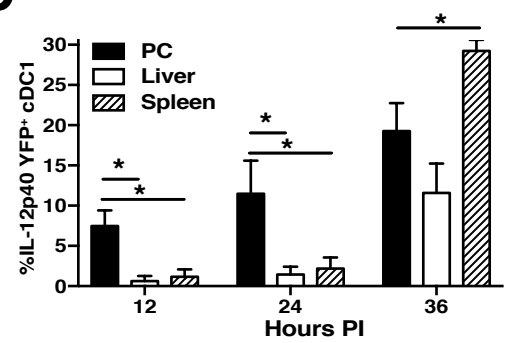

## E

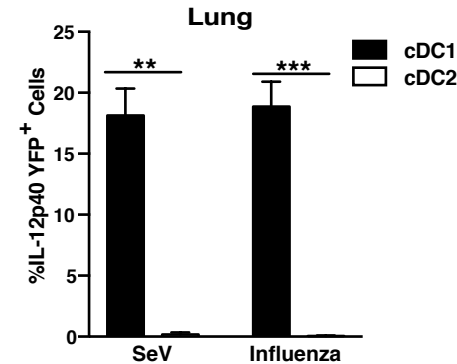

## F

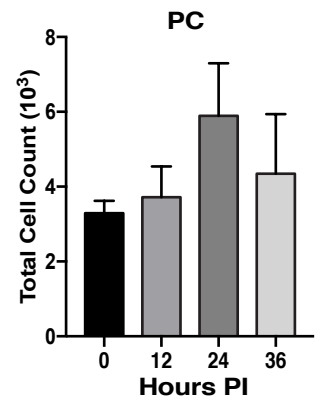

## G

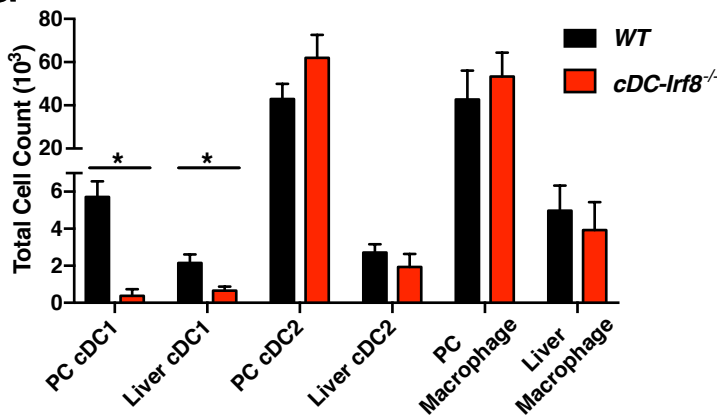

## H

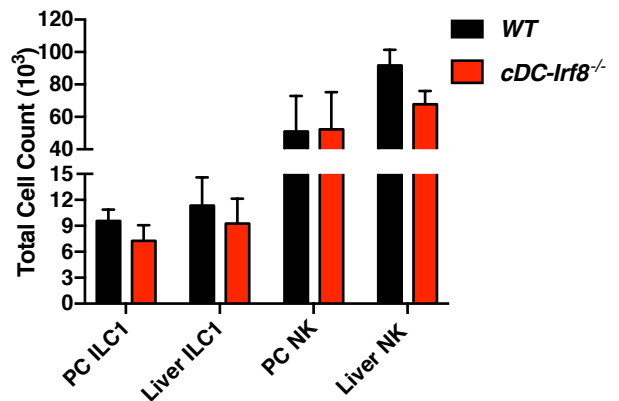

Supplement: NIHMS909950-supplement-7.pdf [file NIHMS909950-supplement-7.pdf]
